# Supplementary material for: Microwave-assisted synthesis of an RGO/CdS/TiO2step-scheme with exposed TiO2{001} facets and enhanced visible photocatalytic activity
Source: Royal Society of Chemistry journal article supplement (doi:10.1039/d0ra08597a), 2020-01-01
Supplement: d0ra08597a1.pdf [file d0ra08597a1.pdf]

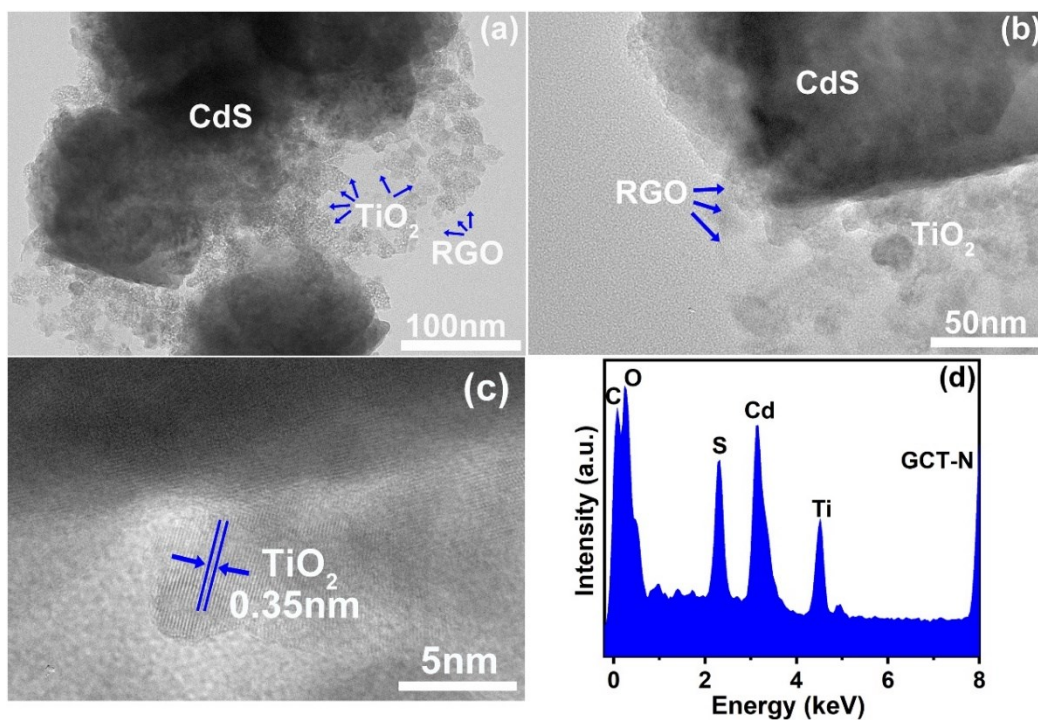

Fig. S1 TEM-EDS images of GCT-N

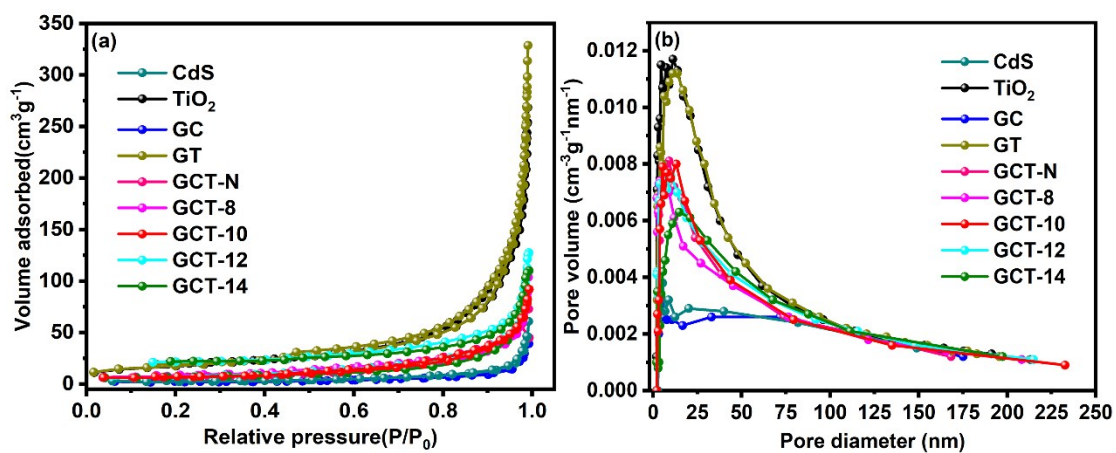

Fig. S2 Nitrogen adsorption-desorption isotherms (a) and the corresponding pore size distribution (b) of the TiO<sub>2</sub>, CdS, GT, GC, GCT-N, GCT-8, GCT-10, GCT-12 and GCT-14
